# Supplementary material for: Melanopsin phototransduction: beyond canonical cascades
Source: PubMed Central journal article supplement (PMC8714064; doi:10.1242/jeb.226522), 2021-11-29
Supplement: jexbio-224-226522-s1.pdf [file jexbio-224-226522-s1.pdf]

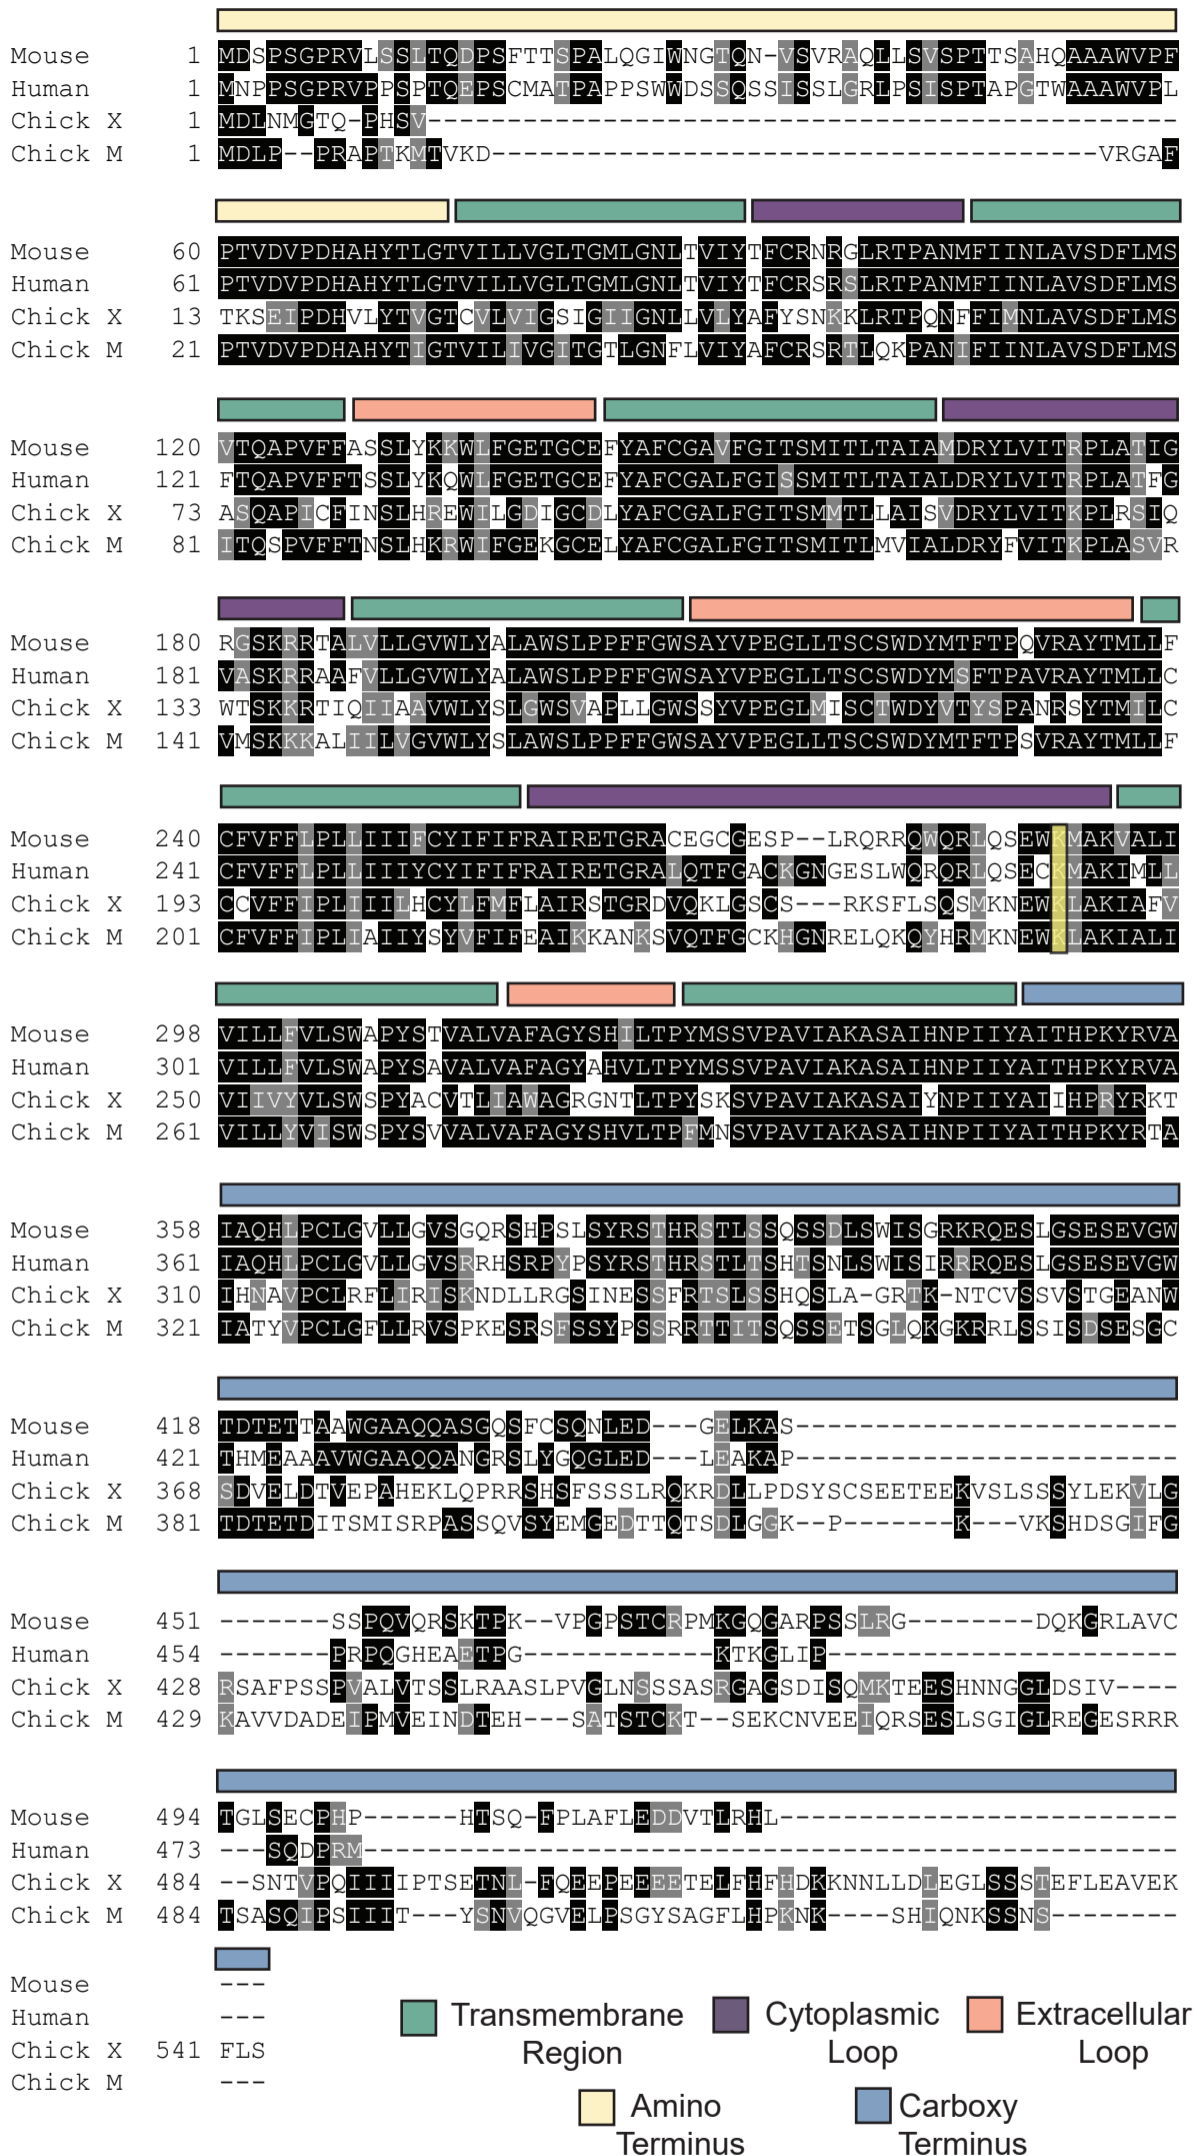

**Fig. S1. Alignment: Sequence alignment of mouse, human, mammalian-like chicken (Chick M), and xenopus-like chicken (Chick X) melanopsins.** An alignment of four melanopsin gene sequences (Uniprot, Appendix A) was created using T-Coffee and BOXSHADE (Notredame et al., 2000; Di Tommaso et al., 2011) Extracellular, intracellular, and transmembrane regions are denoted by overhead bars. The conserved lysine at mouse residue 291 is highlighted. High conservation is seen in the transmembrane regions, while less conservation is observed in both the amino (extracellular) and carboxy (intracellular) termini. Lower conservation in the third cytoplasmic (intracellular) loop as well suggests possible variations in G-protein specificity.

**Table S1. Uniprot Identifiers**

Sequences for phylogenetic analysis and sequence alignment were retrieved from Uniprot. Accession numbers Q2KNE6 (*Gallus gallus*, Opn4m), A9QM68 (*Gallus gallus*, Opn4x), Q9QXZ9 (*Mus musculus*, Opn4), Q9UHM6 (*Homo sapiens*, Opn4), O57422 (*Xenopus laevis* Opn4b), Q2KNE5 (*Danio rerio*, Opn4a), F1QZ18 (*Danio rerio*, Opn4xa), E7FEB1 (*Danio rerio*, Opn4b), G8Z410 (*Danio rerio*, Opn4.1), G8Z413 (*Danio rerio*, Opn4xb), Q8R456 (*Rattus norvegicus*, Opn4), Q6XL69 (*Rutilus rutilus*, Opn4), Q4U4D2 (*Podarcis siculus*, Opn4), and Q4R1I4 (*Branchiostoma belcheri*, Opn4) were used.

| Accession Number | Accession Name            | Organism                                           |
|------------------|---------------------------|----------------------------------------------------|
| Q2KNE6           | Q2KNE6_CHICK (Opn4m)      | <i>Gallus gallus</i> (Chicken)                     |
| A9QM68           | A9QM68_CHICK (Opn4-1) (x) | <i>Gallus gallus</i> (Chicken)                     |
| Q9QXZ9           | OPN4_MOUSE                | <i>Mus musculus</i> (Mouse)                        |
| Q9UHM6           | OPN4_HUMAN                | <i>Homo sapiens</i> (Human)                        |
| O57422           | OPN4B_XENLA               | <i>Xenopus laevis</i> (African clawed frog)        |
| Q2KNE5           | OPN4A_DANRE (Opn4a)       | <i>Danio rerio</i> (Zebrafish) (Brachydanio rerio) |
| F1QZ18           | F1QZ18_DANRE (Opn4xa)     | <i>Danio rerio</i> (Zebrafish) (Brachydanio rerio) |
| E7FEB1           | E7FEB1_DANRE (Opn4b)      | <i>Danio rerio</i> (Zebrafish) (Brachydanio rerio) |
| G8Z410           | G8Z410_DANRE (Opn4.1)     | <i>Danio rerio</i> (Zebrafish) (Brachydanio rerio) |
| G8Z413           | G8Z413_DANRE (Opn4xb)     | <i>Danio rerio</i> (Zebrafish) (Brachydanio rerio) |
| Q8R456           | OPN4_RAT                  | <i>Rattus norvegicus</i> (Rat)                     |
| Q6XL69           | OPN4_RUTRU                | <i>Rutilus rutilus</i> (Roach)                     |
| Q4U4D2           | OPN4_PODSI                | <i>Podarcis siculus</i> (Italian wall lizard)      |
| Q4R1I4           | OPN4_BRABE                | <i>Branchiostoma belcheri</i> (Amphioxus)          |

**References**

- Di Tommaso, P., Moretti, S., Xenarios, I., Orobittg, M., Montanyola, A., Chang, J. M., Taly, J. F. and Notredame, C. (2011). T-Coffee: a web server for the multiple sequence alignment of protein and RNA sequences using structural information and homology extension. *Nucleic Acids Res.* **39**, W13-W17. doi:10.1093/nar/gkr245
- Notredame, C., Higgins, D. G. and Heringa, J. (2000). T-Coffee: a novel method for fast and accurate multiple sequence alignment. *J. Mol. Biol.* **302**, 205-217. doi:10.1006/jmbi.2000.4042
